# Supplementary material for: Topical application of Cas9 ribonucleoproteins inhibits corneal neovascularization in a mouse model of alkali burn injury
Source: Research Square preprint supplement (doi:10.21203/rs.3.rs-7096816/v1), 2025-07-25
Supplement: Supplementary file 1 [file 603c6dce49091f4553b96bc2.docx]

**Supplementary information**

**Topical application of Cas9 ribonucleoprotein inhibits corneal neovascularization in a mouse model of alkali burn injury**

**Seok Jae Lee, Bae-Geun Nam, Sung-Ah Hong, Dong Hyun Jo, Sang-Mok Lee, Sangsu Bae, Jeong Hun Kim**

**Content:**

**Figure S1. Indel confirmation in NIH/3T3 cells**

**Figure S2. VEGFA protein expression throughout the whole corneal layers after intrastromal administration of Cas9-RNPs targeting *Vegfa***

**Figure S3. Analysis of Cas9 RNPs distribution in the cornea following topical treatment *in vivo***

**Figure S4. VEGFA protein expression and recruitment of macrophages of the corneal layer following administration of Cas9-RNPs targeting *Vegfa***

**Table S1. List of Pirmers for targeted deep sequencing**

**Table S2. Sequences of primers for real-time qPCR**


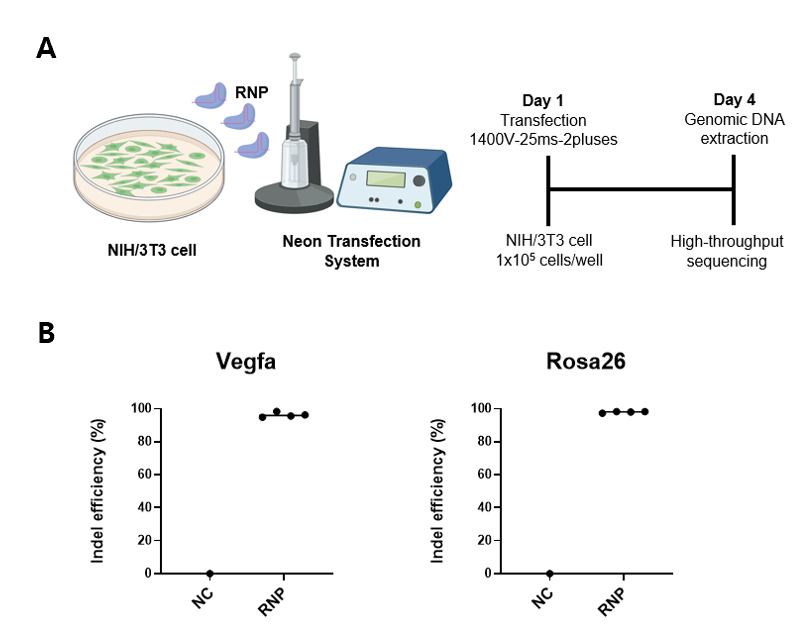


**Fig. S1 Indel confirmation in NIH/3T3 cells**

**A** To measure sgRNA activity, NIH/3T3 cells were transfected with Cas9 RNPs using a Neon Transfection System with the following parameters: voltage, 1,400; width, 25 ms; 2 pulses and collected 4 days after transfection. **B** Individual quantifications of indel frequencies in the mock and two ribonucleoprotein groups are confirmed by targeted deep sequencing on the *Vegfa* and *Rosa26* locus in NIH3T3 (n=1, respectively).


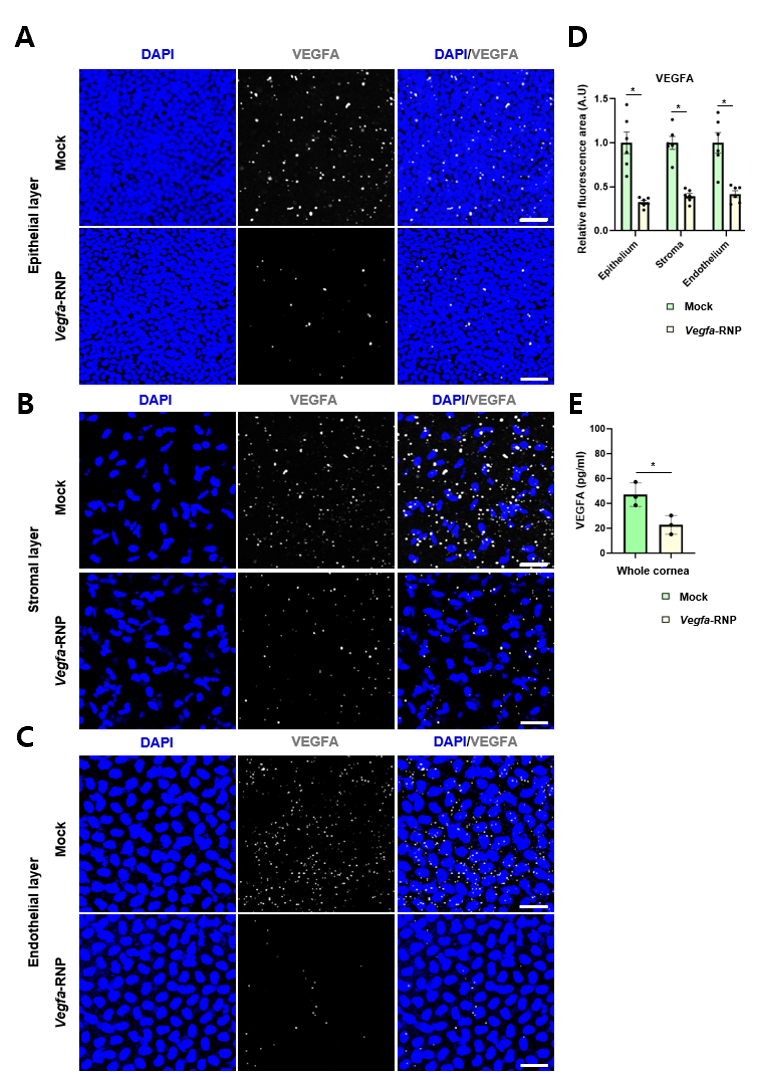


**Fig. S2 VEGFA protein expression throughout the whole corneal layers after intrastromal administration of Cas9-RNPs targeting *Vegfa***

**A-C** Representative immunofluorescence images of anti-vascular endothelial growth factor (VEGFA, gray) and 4′,6-diamidino-2-phenylindole (DAPI, blue) in the central cornea (epithelial, stromal and endothelial layer) of an alkali burn injury model at 3D in the intrastromal mock and Cas9-RNPs targeting *Vegfa* injection groups. The scale bars correspond to 50 μm. **D** Quantitative analyses of the VEGFA positive areas in the whole corneal layers in the mock and Cas9-RNPs targeting *Vegfa* groups. Error bars indicate SEM (n=6 for each data set). **P* < 0.001, obtained using Student's T test. **E** mouse VEGF protein levels in the dissected corneal tissues in the mock and Cas9-RNPs targeting *Vegfa* groups were determined by ELISA (n=3). Error bars indicate SEM. **P* < 0.001, obtained using Student's T test.


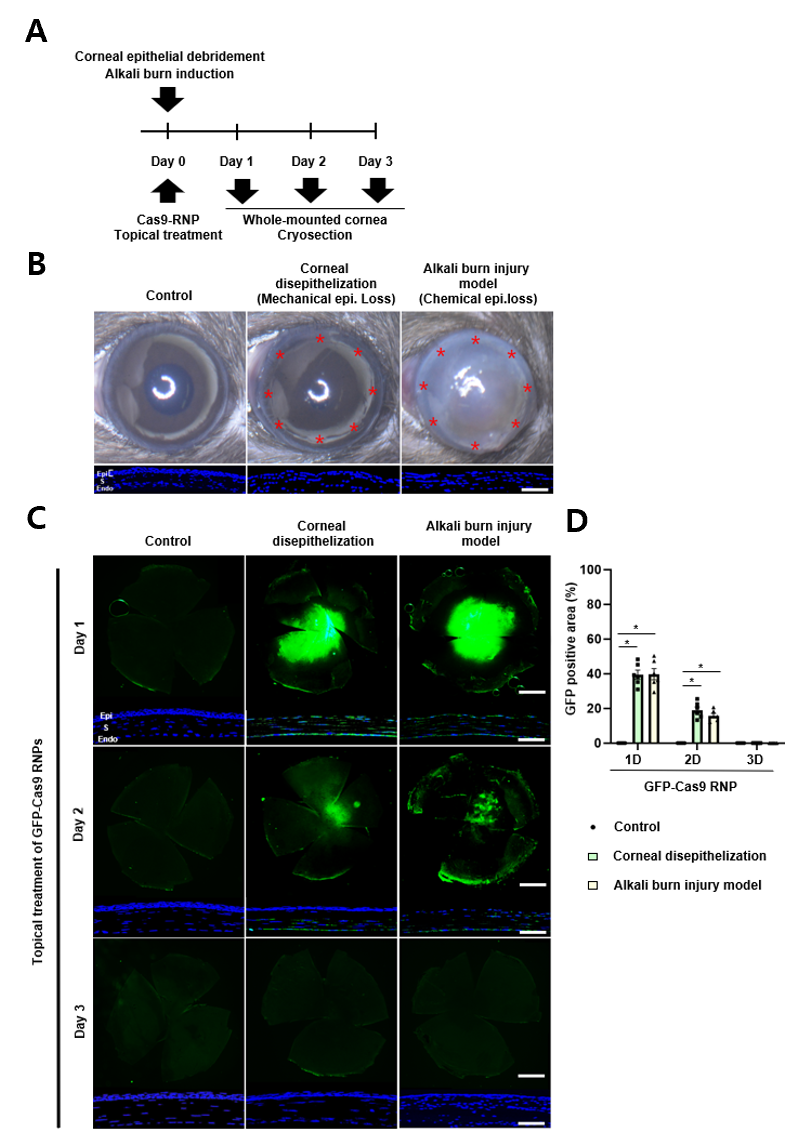


**Fig. S3 Analysis of Cas9 RNPs distribution in the cornea following topical treatment *in vivo* A** Flowchart for evaluating the corneal distribution of green fluorescent protein-clustered regularly interspaced short palindromic repeats-associated protein 9 ribonucleoproteins (GFP-Cas9 RNPs) following topical treatment *in vivo*. Cas9 RNPs composed of Cas9 protein (5 μg), sgRNA targeting *Vegfa* or *Rosa26* (1.67 μg), and Lipofectamine 2000 (20% v/v) mixed in a 3 μL injection volume were applied to the corneas of normal C57BL/6J mice, corneal disepithelization mice, and alkali burn injury mice. Mouse eyeballs were retrieved to prepare whole-mounted corneal samples for immunofluorescence analysis. **B** Representative anterior photo images and cryosected corneas images of normal mice with intact corneal epithelium (control group), mice with mechanical epithelial loss through Alger Brush II® rust ring remover (0.5 mm burr, The Alger Company, Inc.), and mice with alkali burn (1N Sodium Hydroxide)-induced corneal epithelial damage. Asterisks indicate the boundary between the intact and removed epithelial layers of the cornea. The scale bar corresponds to 50 μm. Epi, epithelium; S, stroma; Endo, endothelium. **C** Representative images of whole-mounted and cryosected corneas at 1D, 2D, 3D after single topical GFP-Cas9 RNPs treatment. Scale bars of the whole-mounted and cryosected images correspond to 500 μm and 50 μm, respectively. Images were obtained using a fluorescein microscope (BX50; Olympus) and a confocal microscope (Leica TCS STED; Leica Microsystems Ltd.). **D** Quantification of the GFP-positive area in the whole-mounted corneas in the indicated groups. Error bars represent the standard error of mean (SEM, n =6 for each data set). **P* < 0.001, obtained using one-way ANOVA and Tukey’s post-hoc test.


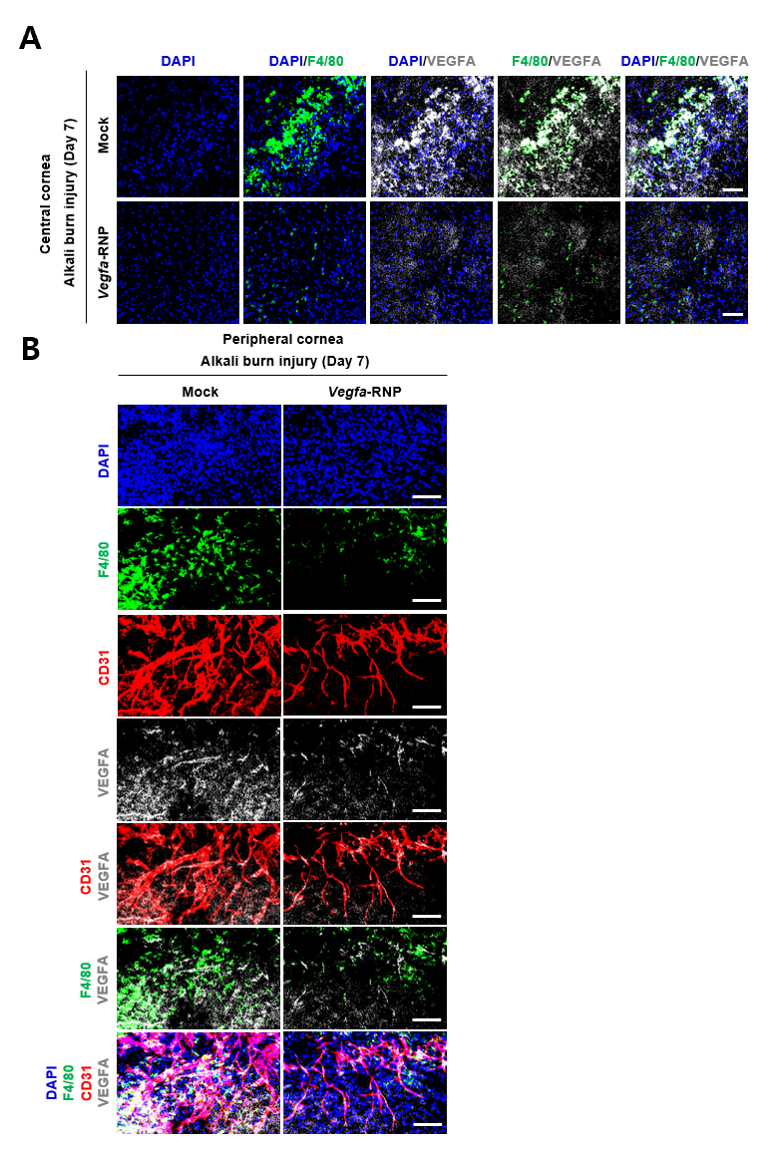


**Fig. S4 VEGFA protein expression and recruitment of macrophages of the corneal layer following administration of Cas9-RNPs targeting *Vegfa***

**A** Representative immunofluorescence images of anti-F4/80 (green), vascular endothelial growth factor (VEGFA, gray), and 4′,6-diamidino-2-phenylindole (DAPI, blue) in the central cornea of an alkali burn injury model at 7D in the mock and Cas9-RNPs targeting *Vegfa*  treatment groups. The scale bars correspond to 50 μm. **B** Representative immunofluorescence images of anti-F4/80 (green), cluster of differentiation 31 (CD31, red), vascular endothelial growth factor (VEGFA, gray), and 4′,6-diamidino-2-phenylindole (DAPI, blue) in the peripheral cornea of an alkali burn injury model at 7D in the mock and Cas9-RNPs targeting *Vegfa* treatment groups. The scale bars correspond to 50 μm.

**Table S1 List of Primers for targeted deep sequencing**

| **Gene** | **Forward (5’-3’)** | **Reverse (5’-3’)** |
| --- | --- | --- |
| ***Vegfa*** | **ACACTCTTTCCCTACACGACGCTC**  **TTCCGATCTcaaatctgggtggcgataga** | **GTGACTGGAGTTCAGACGTGTGCT**  **CTTCCGATCTccagggcttcatcgttaca** |
| ***Rosa26*** | **ACACTCTTTCCCTACACGACGCTC**  **TTCCGATCTtcccaaagtcgctctgagtt** | **GTGACTGGAGTTCAGACGTGTGCT**  **CTTCCGATCTctttaagcctgcccagaaga** |

**Table S2 Sequences of primers for real-time qPCR**

|  | **Gene** | **Forward (5’-3’)** | **Reverse (5’-3’)** |
| --- | --- | --- | --- |
| **Mouse specific** | ***TNF-α*** | **GGTGCCTATGTCTCAGCCTCTT** | **GCCATAGAACTGATGAGAGGGAG** |
| ***IL-6*** | **TACCACTTCACAAGTCGGAGGC** | **CTGCAAGTGCATCATCGTTGTTC** |
| ***CCL2*** | **GCTACAAGAGGATCACCAGCAG** | **GTCTGGACCCATTCCTTCTTGG** |
| ***CXCL12*** | **GGAGGATAGATGTGCTCTGGAAC** | **AGTGAGGATGGAGACCGTGGTG** |
| ***GAPDH*** | **CATCACTGCCACCCAGAAGACTG** | **ATGCCAGTGAGCTTCCCGTTCAG** |
